# Supplementary figures and images for: The amino acid permease (AAP) genes CsAAP2A and SlAAP5A/B are required for oomycete susceptibility in cucumber and tomato
Source: PubMed Central journal article supplement — Mol Plant Pathol. 2021 May 2;22(6):658–72. doi: 10.1111/mpp.13052 (PMC8126186; doi:10.1111/mpp.13052), 2021-05-02

**A**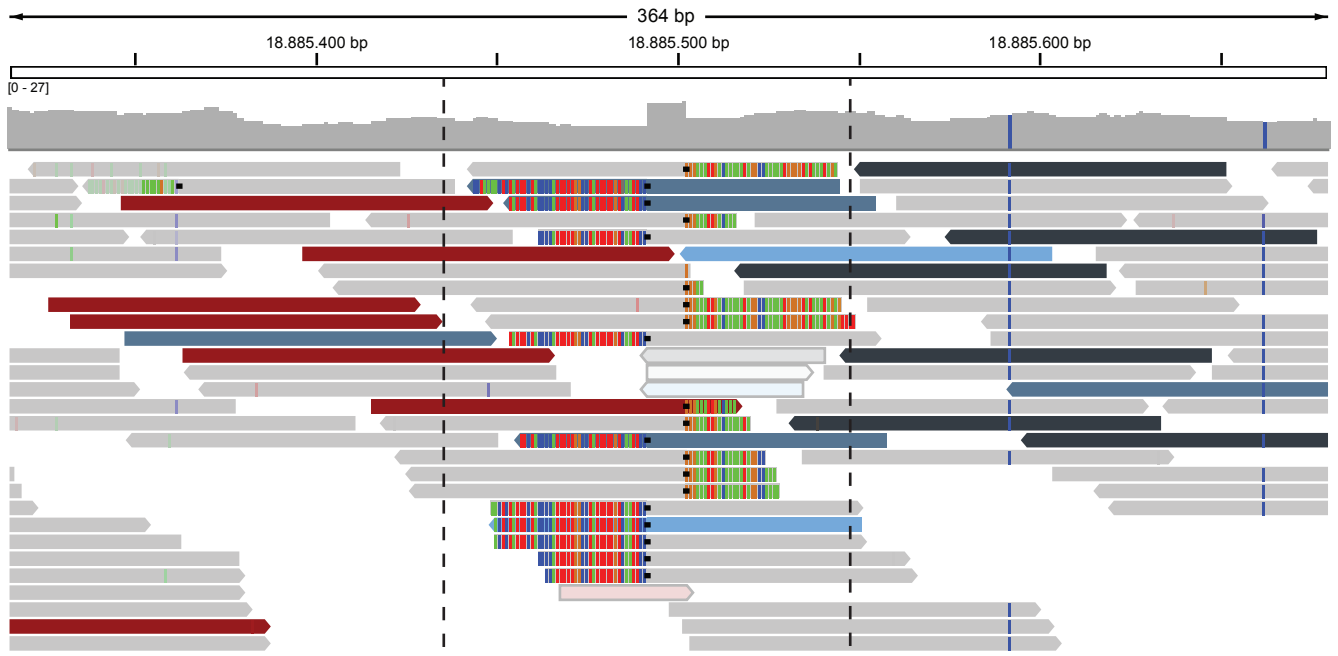**B**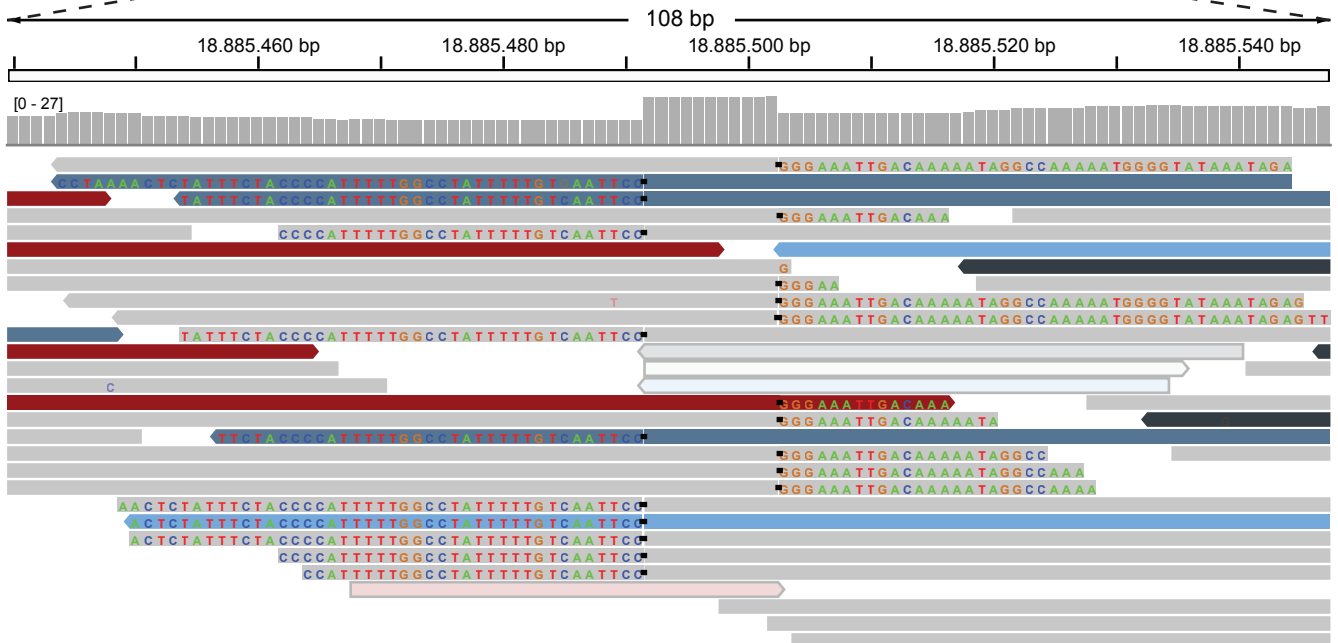

Supplement: MPP-22-658-s004.pdf [file MPP-22-658-s004.pdf]
